# Supplementary material for: Nano-LC-MS/MS based proteomics of hepatocellular carcinoma cells compared to Chang liver cells and tanshinone IIA induction
Source: Royal Society of Chemistry journal article supplement (doi:10.1039/c0mb00343c), 2011-03-21
Supplement: c0mb00343c.pdf [file c0mb00343c.pdf]

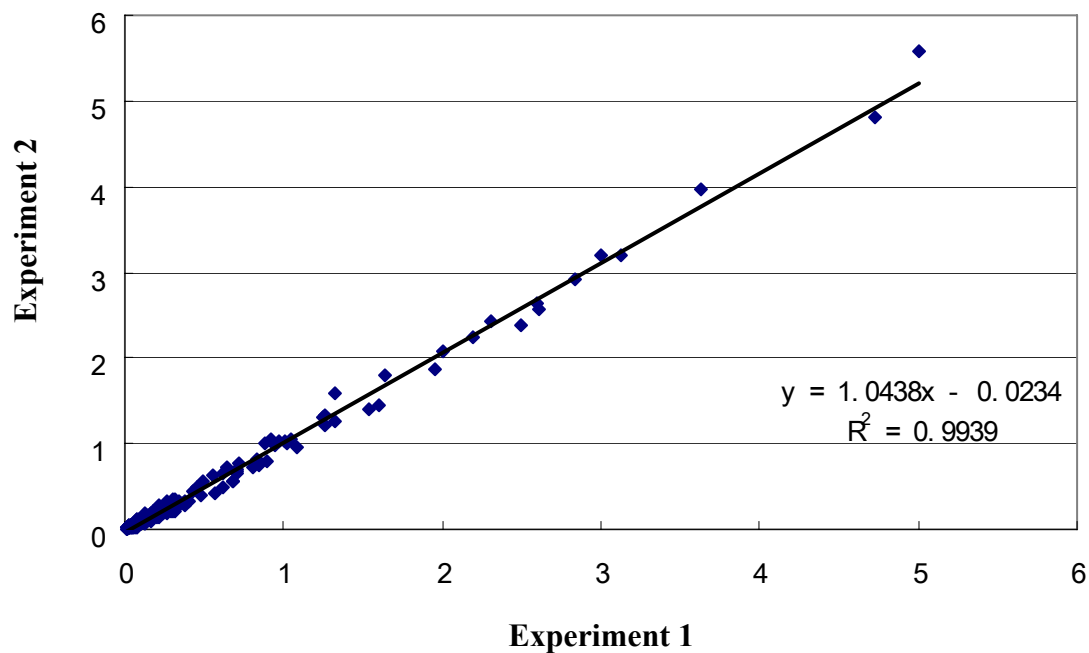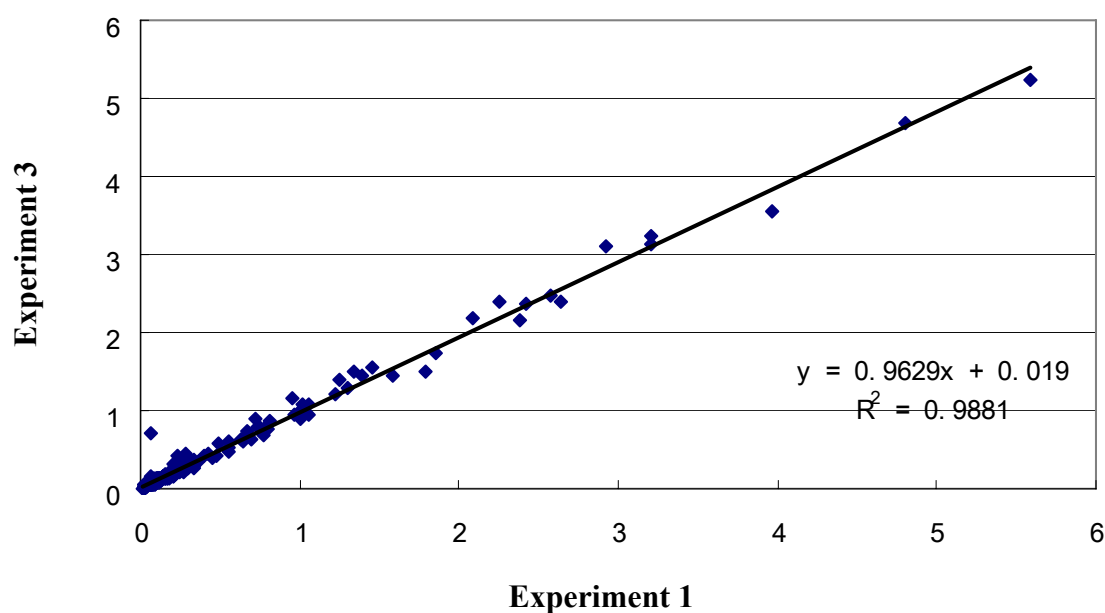

**Supplementary Figure 1 The reproductive analysis of the sample.** Three replicate LC-MS/MS analyses were run for each sample. Each spot represents a protein pairwise with its relative abundance in the sample from the first and second analysis shown on the  $x$ -axis and the  $y$ -axis, respectively. Comparison of duplicate measurements showed that correlation coefficients  $R^2$  value between two consecutive experiments under the identical conditions was greater than 0.95, indicating the reproducibility and reliability of the sample preparation in independent replicates.
